# Supplementary material for: Microfluidic interrogation and mathematical modeling of multi-regime calcium signaling dynamics
Source: Royal Society of Chemistry journal article supplement (doi:10.1039/c3ib40032h), 2013-01-01

## Supplementary Information

Mathematical Model Equations:

### (1) Calcium Dynamics

$$\begin{aligned}
 v_{plc} &= (V_{plc} + basal) * \left( \frac{[Ca^{2+}]^2}{K_{plc}^2 + [Ca^{2+}]^2} \right) \\
 v_{deg} &= (k_{5p} + k_{3k} * \left( \frac{[Ca^{2+}]^2}{K_{3k}^2 + [Ca^{2+}]^2} \right)) * [IP3] \\
 v_{rel} &= \left( k_1 * \left( [IP3r] * \frac{[Ca^{2+}]}{K_a + [Ca^{2+}]} * \frac{[IP3]}{K_p + [IP3]} \right)^3 + k_2 \right) * ([Ca^{2+}(ER)] - [Ca^{2+}]) \\
 v_{serca} &= V_{serca} * \left( \frac{[Ca^{2+}]^2}{K_{serca}^2 + [Ca^{2+}]^2} \right) \\
 v_{in} &= v_0 + \emptyset * V_{plc} * \left( \frac{1}{k_{3k} + k_{5p}} \right) \\
 v_{out} &= V_{pm} * \left( \frac{[Ca^{2+}]^2}{K_{pm}^2 + [Ca^{2+}]^2} \right) \\
 \frac{d[IP3]}{dt} &= v_{plc} - v_{deg} \\
 \frac{d[Ca^{2+}]}{dt} &= v_{rel} - v_{serca} + \varepsilon * (v_{in} - v_{out}) \\
 \frac{d[Ca^{2+}(ER)]}{dt} &= \left( \frac{1}{\beta} \right) * (v_{serca} - v_{rel}) \\
 \frac{d[IP3r]}{dt} &= \left( \frac{1}{Tr} \right) * \left( 1 - [IP3r] * \frac{K_i + [Ca^{2+}]}{K_i} \right)
 \end{aligned}$$

### (2) Conservation equations

R = receptor available for binding, R<sub>tot</sub> = total receptor, [LR] = Ligand-Receptor Complex, G = available G-protein for activation, G<sub>tot</sub> = total G-protein, [GGTP] = Active G-protein, [GGDP] = Inactive G-protein, [PLC\*] = activated PLC, PLC<sub>tot</sub> = total PLC, Gβγ = G-protein subunit, [LRp] = Ligand-phosphorylated Receptor complex, [Rp] = phosphorylated Receptor, [Rrec] = Recycled Receptor

$$R = R_{tot} - [LR] - [LRp] - [Rp] + R_{rec}$$

$$G = G_{tot} - [GGTP] - [GGDP] - [PLC *]$$

$$G\beta\gamma = [GGTP] + [GGDP] + [PLC *]$$
$$PLC = PLC_{tot} - [PLC *]$$

**(3) Ligand, Receptor, G-protein dynamics**

$$\frac{d[LR]}{dt} = k_{1L} * R * L - k_{2L} * [LR] - k_{grk1f} * [LR] + k_{grk1r} * [LRp]$$
$$\frac{d[GGTP]}{dt} = -k_4 * [GGTP] + k_5 * G * [LR] - k_6 * PLC * [GGTP] + k_3 * G$$
$$\frac{d[GGDP]}{dt} = k_4 * [GGTP] + k_4 * [PLC *] - k_7 * [GGDP] * G\beta\gamma$$
$$\frac{d[PLC *]}{dt} = k_6 * PLC * [GGTP] - k_4 * [PLC *]$$

**(4) Receptor Phosphorylation Dynamics**

$$\frac{d[LRp]}{dt} = k_{grk1f} * [LR] - k_{grk1r} * [LRp] + k_{grk2r} * [Rp] - k_{grk2f} * [LRp]$$
$$\frac{d[Rp]}{dt} = -k_{grk2r} * [Rp] + k_{grk2f} * [LRp] - k_{grk3r} * [Rp]$$
$$\frac{d[Rrec]}{dt} = k_{grk2r} * [Rp] - k_{1L} * L * [Rrec]$$

**Model Parameters:**

| Parameter | Description                                  | Value                   |
|-----------|----------------------------------------------|-------------------------|
| K3k       | Half-activation constant of IP3K             | 0.465 μM                |
| k5p       | IP3 dephosphorylation rate constant          | 0.56 s <sup>-1</sup>    |
| β         | Ratio of effective volumes of the ER/cytosol | 0.185                   |
| Kserca    | Half-activation constant for SERCA pump      | 0.076 μM                |
| Kpm       | Half-activation constant for PMCA pump       | 0.076 μM                |
| φ         | Stimulation-dependent influx                 | 0.0024 s <sup>-1</sup>  |
| Ctot      | Total Calcium concentration                  | 2 μM                    |
| k2        | Calcium leak                                 | 0.014 s <sup>-1</sup>   |
| Ki        | Calcium binding to inhibiting site           | 0.469 μM                |
| Tr        | Characteristic time of IP3r inactivation     | 7 s                     |
| k3k       | IP3 phosphorylation rate constant            | 0                       |
| Kplc      | Half-activation constant of PLC              | 0.213 μM                |
| Vserca    | Maximal SERCA pump rate                      | 0.27 μM s <sup>-1</sup> |

|            |                                                                   |                                      |
|------------|-------------------------------------------------------------------|--------------------------------------|
| Vpm        | Maximal PMCA pump rate                                            | 0.014 $\mu\text{M s}^{-1}$           |
| v0         | Basal calcium flux                                                | 0.0001 $\mu\text{M s}^{-1}$          |
| $\epsilon$ | Calcium flux strength                                             | 5                                    |
| k1         | Maximal rate of calcium release                                   | 0.85 $\text{s}^{-1}$                 |
| Ka         | Calcium binding to activating site                                | 0.059 $\mu\text{M}$                  |
| Kp         | IP3 binding                                                       | 0.13 $\mu\text{M}$                   |
| basal      | Basal IP3 production rate by PLC                                  | 0.3 $\mu\text{M s}^{-1}$             |
| k1L        | Ligand-receptor association rate constant                         | 2.3 $\mu\text{M}^{-1} \text{s}^{-1}$ |
| k2L        | Ligand-receptor dissociation rate constant                        | 0.07 $\text{s}^{-1}$                 |
| k3         | Basal exchange rate of GTP for GDP on G $\alpha$ subunit          | 0.008 $\text{s}^{-1}$                |
| k4         | Rate constant for hydrolysis of G $\alpha$ GTP to G $\alpha$ GDP  | 2 $\text{s}^{-1}$                    |
| k5         | Encounter rate constant for ligand-receptor complex and G-protein | 2*10 <sup>-5</sup> $\text{s}^{-1}$   |
| k6         | Encounter rate constant for PLC and G $\alpha$ GTP                | 2*10 <sup>-5</sup> $\text{s}^{-1}$   |
| k7         | Encounter rate constant for $\beta\gamma$ and G $\alpha$ GDP      | 1*10 <sup>-5</sup> $\text{s}^{-1}$   |
| Rtot       | Receptor total                                                    | 0.068 $\mu\text{M}$                  |
| Gtot       | G-protein total                                                   | 0.2 $\mu\text{M}$                    |
| PLCtot     | PLC total                                                         | 0.1 $\mu\text{M}$                    |
| kgrk1f     | GRK-mediated receptor phosphorylation rate constant               | 0.0324 $\text{s}^{-1}$               |
| kgrk1r     | Receptor dephosphorylation rate constant                          | 6*10 <sup>-4</sup> $\text{s}^{-1}$   |
| kgrk2f     | Ligand dissociation rate constant with phosphorylated receptor    | 0.0919 $\text{s}^{-1}$               |
| kgrk2r     | Ligand association rate constant with phosphorylated receptor     | 1*10 <sup>-4</sup> $\text{s}^{-1}$   |
| kgrk3r     | Receptor dephosphorylation rate constant without ligand           | 0.007 $\text{s}^{-1}$                |

**Model Schematic:**

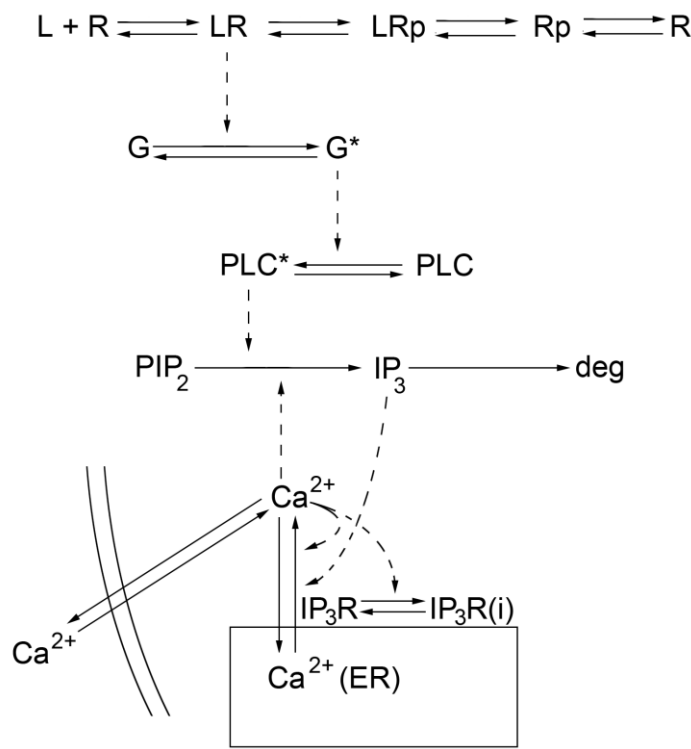

Supplement: c3ib40032h.pdf [file c3ib40032h.pdf]
